# Supplementary material for: Laminin-511 and recombinant vitronectin supplementation enables human pluripotent stem cell culture and differentiation on conventional tissue culture polystyrene surfaces in xeno-free conditions
Source: Royal Society of Chemistry journal article supplement (doi:10.1039/d1tb01878g), 2021-01-01
Supplement: d1tb01878g1.pdf [file d1tb01878g1.pdf]

**Laminin-511 and recombinant vitronectin supplementation enables human pluripotent stem cell culture and differentiation on conventional tissue culture polystyrene surface in xeno-free conditions**

Ya-Chu Liu,<sup>‡a</sup> Lee-Kiat Ban,<sup>‡b</sup> Henry Hsin-Chung Lee,<sup>‡b,c</sup> Hsin-Ting Lee,<sup>a</sup> Yu-Tang Chang,<sup>a</sup> Yun-Ting Lin,<sup>a</sup> Her-Young Su,<sup>d</sup> Shih-Tien Hsu,<sup>e</sup> Akon Higuchi<sup>\*a,f</sup>

<sup>a</sup>Department of Chemical and Materials Engineering, National Central University, No. 300, Jhongda RD., Jhongli, Taoyuan 32001, Taiwan

<sup>b</sup>Department of Surgery, Hsinchu Cathay General Hospital, No. 678, Sec 2, Zhonghua Rd., Hsinchu, 30060, Taiwan

<sup>c</sup>Graduate Institute of Translational and Interdisciplinary Medicine, National Central University, No. 300, Jhongda Rd., Jhongli, Taoyuan, 32001, Taiwan

<sup>d</sup>Department of Obstetrics and Gynecology, Bobson Yuho Women and Children's Clinic, No. 182, Zhuangjing S. Rd., Zhubei City, Hsinchu 302, Taiwan

<sup>e</sup>Department of Internal Medicine, Taiwan Landseed Hospital, 77, Kuangtai Road, Pingjen City, Taoyuan 32405, Taiwan

<sup>f</sup>R&D Center for Membrane Technology, Chung Yuan Christian University, Chungli, Taoyuan 320, Taiwan

\* Correspondence author. Department of Chemical and Materials Engineering, National Central University, No. 300, Jhongda RD., Jhongli, Taoyuan 32001, Taiwan

Tel.: +886 34227151; fax: +886 3-2804271.

E-mail address: [higuchi@ncu.edu.tw](mailto:higuchi@ncu.edu.tw) (A. Higuchi)

<sup>†</sup>These authors contributed equally to this work.

## Supplementary Information

**Supplementary Table 1** Materials used in this study.

| Materials                                                           | Abbreviation                            | Catalog No.                  | Company                                            |
|---------------------------------------------------------------------|-----------------------------------------|------------------------------|----------------------------------------------------|
| <b>ECM</b>                                                          |                                         |                              |                                                    |
| Matrigel                                                            | Matrigel                                | #356230                      | Corning (Corning, NY, USA)                         |
| Recombinant vitronectin                                             | rVT                                     | A14700                       | Thermo Fisher Scientific Inc. (Waltham, MA, USA)   |
| Laminin 511                                                         | L-511                                   | 892011                       | Nippi Inc. (Tokyo, Japan)                          |
| Laminin 521                                                         | L-521                                   | BLA-LN521-02                 | Veritas (Tokyo, Japan)                             |
| <b>Cell culture dishes</b>                                          |                                         |                              |                                                    |
| 6-well polystyrene plate                                            | TCP                                     | #353046                      | Corning (Corning, NY, USA)                         |
| <b>Chemicals &amp; Polymer</b>                                      |                                         |                              |                                                    |
| Dispase II                                                          | Dispase                                 | D4693-1G                     | Sigma-Aldrich (St. Louis, MO, USA)                 |
| N-hydroxysuccinimide                                                | NHS                                     | 13062                        | Sigma-Aldrich (St. Louis, MO, USA)                 |
| N-(3-Dimethylaminopropyl)-<br>N'-ethylcarbodiimide<br>hydrochloride | EDC                                     | 3450                         | Sigma-Aldrich (St. Louis, MO, USA)                 |
| <b>Cell culture medium and component</b>                            |                                         |                              |                                                    |
| Essential 8 medium                                                  | Essential 8                             | A1517001                     | Thermo Fisher Scientific Inc. (Waltham, MA, USA)   |
| Essential 6 medium                                                  | Essential 6                             | A1516401                     | Thermo Fisher Scientific Inc. (Waltham, MA, USA)   |
| DMEM/F12 medium                                                     | DMEM/F12                                | 11330-057                    | Thermo Fisher Scientific Inc. (Waltham, MA, USA)   |
| RPMI 1640                                                           | RPMI 1640                               | 11875093                     | Thermo Fisher Scientific Inc. (Waltham, MA, USA)   |
| Alkaline Phosphatase Assay<br>Kit                                   | SensoLyte® pNPP                         | AS-72146                     | AnaSpec, Inc. (Fremont, CA, USA)                   |
| DAPI                                                                | DAPI                                    | D9542                        | Sigma-Aldrich (St. Louis, MO, USA)                 |
| Hoechst 33342                                                       | Hoechst                                 | PA-3014                      | Lonza (Basel, Switzerland)                         |
| B-27™ Supplement, minus<br>insulin                                  | B27-                                    | A1895601                     | Thermo Fisher Scientific Inc. (Waltham, MA, USA)   |
| B-27™ Supplement                                                    | B27                                     | 17504044                     | Thermo Fisher Scientific Inc. (Waltham, MA, USA)   |
| CHIR99021                                                           | CHIR99021                               | SML1046                      | Sigma-Aldrich (St. Louis, MO, USA)                 |
| IWR-1                                                               | IWR-1                                   | I0161                        | Sigma-Aldrich (St. Louis, MO, USA)                 |
| <b>Antibodies</b>                                                   |                                         |                              |                                                    |
| Anti-Oct3/4 antibody                                                | Anti-Oct3/4 antibody                    | sc-5279                      | Santa Cruz Biotechnology (Dallas, TX, USA)         |
| Anti-Sox2 antibody                                                  | Anti-Sox2 antibody                      | AB5603                       | Merck KGaA (Darmstadt, Germany)                    |
| Anti-SSEA-4 antibody                                                | Anti-SSEA-4<br>antibody                 | ab16287                      | Abcam (Cambridge, MA, USA)                         |
| Anti-Nanog antibody                                                 | Anti-Nanog antibody                     | MA1-017                      | Thermo Fisher Scientific Inc. (Waltham, MA, USA)   |
| Anti- $\alpha$ -actinin antibody                                    | Anti- $\alpha$ -actinin<br>antibody     | A7811                        | Sigma-Aldrich (St. Louis, MO, USA)                 |
| Anti-MLC2v antibody                                                 | Anti-MLC2v<br>antibody                  | ab92721                      | Abcam (Milton, Cambridge, UK)                      |
| Anti-MLC2a antibody                                                 | Anti-MLC2a<br>antibody                  | ab50967                      | Abcam (Milton, Cambridge, UK)                      |
| Anti-NKX2.5 antibody                                                | Anti-NKX2.5<br>antibody                 | ab97355                      | Abcam (Milton, Cambridge, UK)                      |
| Anti-cTnT antibody                                                  | Anti-cTnT antibody                      | MA5-12960                    | Thermo Fisher Scientific Inc. (Waltham, MA, USA)   |
| Mouse IgG1 Isotype antibody                                         | Isotype-control                         | MA5-14453                    | Thermo Fisher Scientific Inc. (Waltham, MA, USA)   |
| Alexa Fluor 488 goat anti-<br>mouse IgG                             | Alexa Fluor 488 goat<br>anti-mouse IgG  | A-11001                      | Thermo Fisher Scientific Inc. (Waltham, MA, USA)   |
| Alexa Fluor 488 goat anti-<br>rabbit IgG                            | Alexa Fluor 488 goat<br>anti-rabbit IgG | A-11008                      | Thermo Fisher Scientific Inc. (Waltham, MA, USA)   |
| Alexa Fluor 555 goat anti-<br>mouse IgG                             | Alexa Fluor 555 goat<br>anti-mouse IgG  | A-21424                      | Thermo Fisher Scientific Inc. (Waltham, MA, USA)   |
| Alexa Fluor 555 goat anti-<br>rabbit IgG                            | Alexa Fluor 555 goat<br>anti-rabbit IgG | ab150078                     | Abcam (Milton, Cambridge, UK)                      |
| <b>Mice</b>                                                         |                                         |                              |                                                    |
| NOD.CB17-<br>Prkdcscid/Jnar1                                        | NOD-SCID mice                           | NOD.CB17-<br>Prkdcscid/Jnar1 | National Laboratory Animal Center (Taipei, Taiwan) |

## A. Pluripotent protein expression

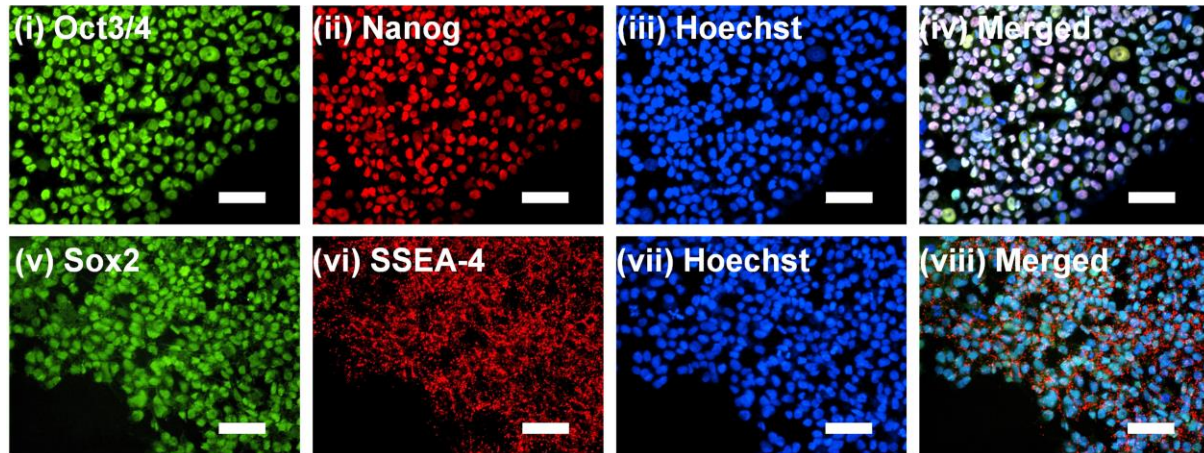

## B. Differentiated protein expression

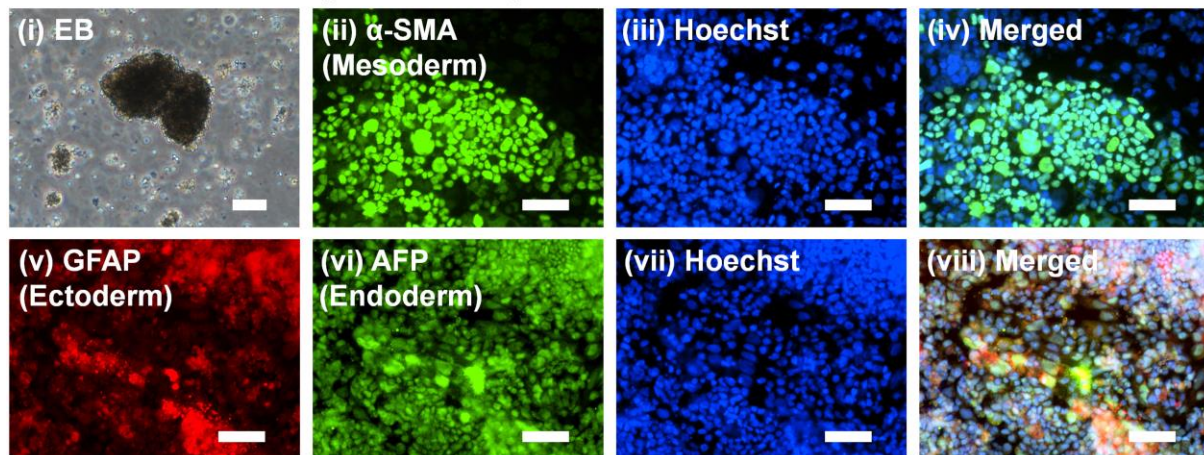

**Supplementary Fig. 1** Pluripotent protein and differentiation protein expression of hiPSCs (H-M5) after long-term cultivation for ten passages on untreated TCP dishes in the supplemented method using Mix-0.2 conditionS in xeno-free culture condition. (A) Pluripotency protein expression of Oct3/4 (i, green), Nanog (ii, red), Sox2 (v, green), and SSEA-4 (vi, red) in hiPSCs (H-M5) evaluated by immunostaining method, with nuclear staining by Hoechst 33342 (blue, iii, vii). The photos (iv) and (viii) were merged from the photos of (i) – (iii) and (v) – (vii), respectively. Scale bar indicates 100  $\mu$ m. (B) Evaluation of the differentiation ability of hiPSCs (H-M5) *in vitro* after long-term cultivation for ten passages on untreated TCP dishes in the supplemented method using Mix-0.2 condition in xeno-free culture condition. Morphology of EB cells differentiated from hPSCs (i). Expression of a mesodermal marker protein (ii,  $\alpha$ -SMA, green), an ectodermal marker protein (v, GFAP, red) and an endodermal marker protein (vi, AFP, green) from EB cells evaluated by the immunostaining method, with nuclear staining from Hoechst 33342 (iii, vii, blue). The photos (iv) and (viii) were merged from the photos of (ii) – (iii) and (v) – (vii), respectively. The scale bar indicates 100  $\mu$ m.

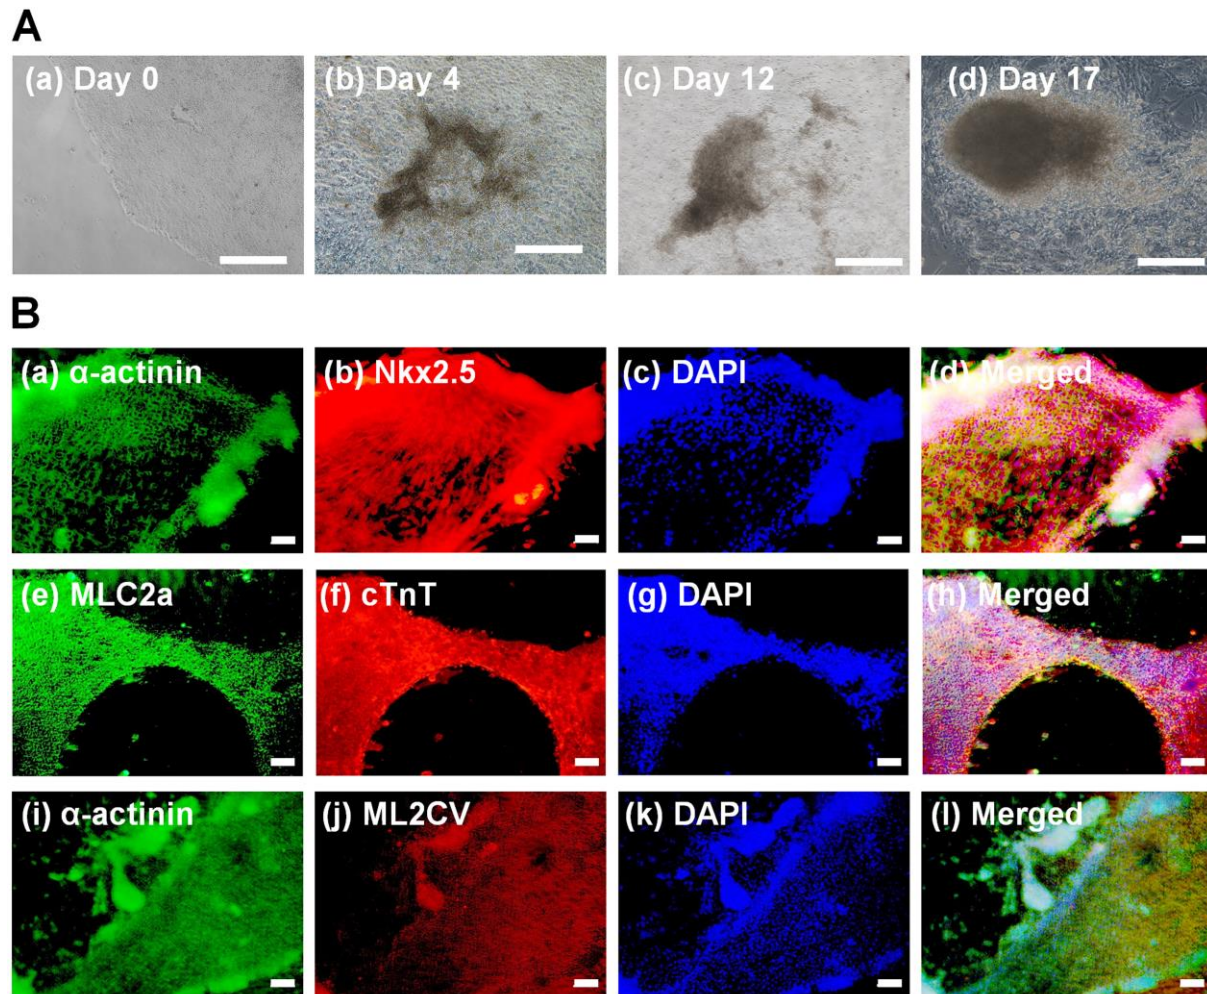

**Supplementary Fig. 2** Cardiac differentiation of hESCs (H9) after hESC culture for ten passages on untreated TCP dishes in the supplemented method using Mix-0.2 condition in xeno-free culture condition. (A) Timeline of the differentiation protocol for hESCs into cardiomyocytes. (B) The sequential morphological observation during cardiac induction of hESCs at day 0, 4, 12, and 17. The scale bar shows 100  $\mu$ m. (C) Immunostaining evaluation of hESC-derived cardiomyocytes. Expression of  $\alpha$ -actinin (a and i, green), NKX2.5 (b, red), MLC2a (e, green), cTnT (f, red) and ML2Cv (j, red) on hESC-derived cardiomyocytes after 21 day of differentiation. DAPI (c, g, and k) was utilized for nuclei staining. The photos (d), (h) and (l) were created by merging (a) – (c), (e) – (g), and (i) – (k), respectively. The scale bar shows 100  $\mu$ m. (D) The expression of cardiac marker, cTnT on hESC-induced cardiomyocytes were evaluated using flow cytometry.
